# Integer topological defects organize stresses driving tissue morphogenesis

Pau Guillaumat<sup>1,†</sup>, Carles Blanch-Mercader<sup>1,2,†</sup>, Karsten Kruse<sup>1,2,3,\*</sup>, Aurélien Roux<sup>1,3,\*</sup>

<sup>1</sup>Department of Biochemistry, University of Geneva, CH-1211 Geneva, Switzerland.

<sup>2</sup>Department of Theoretical Physics, University of Geneva, CH-1211 Geneva, Switzerland.

<sup>3</sup>NCCR for Chemical Biology, University of Geneva, CH-1211 Geneva, Switzerland.

<sup>†</sup>These authors contributed equally to this work.

\*Correspondence to: [karsten.kruse@unige.ch](mailto:karsten.kruse@unige.ch), [aurelien.roux@unige.ch](mailto:aurelien.roux@unige.ch)

## Abstract

Tissues acquire their function and shape via differentiation and morphogenesis. Both processes are driven by coordinating cellular forces and shapes at the tissue scale, but general principles governing this interplay remain to be discovered. Here, we report that self-organization of myoblasts around integer topological defects, namely spirals and asters, triggers localized differentiation and, when differentiation is inhibited, drives the growth of cylindrical multicellular protrusions. Both localized differentiation and growth require specific stress patterns. By analyzing the experimental velocity and orientation profiles through active gel theory, we show that integer topological defects can concentrate compressive stresses, which we measure by using deformable pillars. Altogether, we envision topological defects as mechanical organizational centers that control differentiation and morphogenesis to establish tissue architecture.

## 28 Main text

29 Morphogenesis establishes shapes of tissues during development. It comprises a wide  
30 variety of dynamic force-generating processes, founded on actin-based cell contractility  
31 and motility(1). Tissue folding, for example, can be driven by apical constriction(2).  
32 On the other hand, most cells in living tissues are polarized, featuring anisotropic  
33 distribution of their constituents. At the single cell level, polarity is usually coupled to  
34 directional motility and anisotropic contractility(3, 4). At the tissue level, forces and  
35 polarities of many cells need to be coordinated to generate the stress patterns required  
36 for creating specific tissue architectures.

37 One usual marker of cell polarity is shape anisotropy(1). Akin to elongated molecules  
38 in liquid crystals(5), elongated cells can self-organize into patterns featuring long-range  
39 orientational order (6–9). Orientational fields often present topological defects, where  
40 the orientational order is ill-defined. Still, they imply very specific orientational  
41 configurations around their cores(5). In active systems – driven by internal energy-  
42 consuming processes – topological defects entail characteristic flow and stress patterns  
43 that depend on the defects' topological strength  $s$ , which indicates the rotation  
44 experienced by the orientational field along a path encircling a defect's core(10). In  
45 particular, the dynamics associated with half-integer defects ( $s=\pm 1/2$ ) – loops and  
46 triradii – have been thoroughly studied both experimentally(10–12) and  
47 theoretically(13, 14). Importantly, in cell monolayers, the position of half-integer  
48 defects correlates with biologically-relevant processes such as cell extrusion(15) or  
49 changes in cell density(16).

50 Nevertheless, the role of integer defects ( $s=\pm 1$ ) – whorls, asters or vortices – in living  
51 systems is unknown. Yet, integer defects abound in nature(17), mostly because of their  
52 symmetry, as structural organizers of plants' and animals' body plans: spiraling  
53 organization of leaves or astral arrangement of spikes on the sea urchin shell are few  
54 examples. Thus, integer defects may also play essential roles during establishment of  
55 tissues' architecture. Indeed, their position correlates with the establishment of the body  
56 plan of hydra during regeneration *in vivo*(18). *In vitro*, formation of cellular integer  
57 defects has been enforced by imposing the orientational field externally(19–21).  
58 Nevertheless, whether the active mechanics of integer defects is involved in modelling  
59 tissues remains unexplored.

60 To generate cellular integer topological defects we used C2C12 myoblasts, which not  
 61 only are elongated cells but can differentiate and fuse to form myotubes, the precursors  
 62 of skeletal muscle(22). Mechanical stimuli can induce differentiation(23, 24).  
 63 Consistently with previous studies(8, 25), physical interaction between C2C12 cells  
 64 resulted in collective alignment and, subsequently, in the emergence of long-range  
 65 orientational order (Fig.1A, Fig.S1 and Movie S1). Also, as previously reported(16,  
 66 25), orientational order decreased locally at places of frustrated cell arrangements,  
 67 which constituted topological defects  $s=\pm\frac{1}{2}$  (Fig.1A and Methods). After confluence,  
 68 the spatial nematic correlation distance,  $\xi_{nn}$ , reached a plateau at  $190\pm 10\mu\text{m}$   
 69 (mean $\pm$ SE, as anywhere in this work, Fig.1B, Fig.S1), setting a characteristic length  
 70 scale coinciding with inter-defect spacing (Fig.1B, inset, and Methods).

71 Inspired by previous studies(25–29), we reasoned that using circular confinement  
 72 below the inter-defect characteristic length would induce cellular arrangements with  
 73 one single defect with  $s=+1$ . Accordingly, C2C12 myoblasts were seeded on  
 74 fibronectin-coated discs (Fig.1C) with diameters of the order of  $\xi_{nn}$ . Reaching  
 75 confluence on discs, C2C12 cells self-organized into spiral patterns, which exhibited  
 76 persistent rotation for several hours (Fig.1D-H, 3-10h). Further proliferation led to the  
 77 transformation of spirals into asters (Fig.1D-H, 10-26h), in which cells oriented radially  
 78 from the center of the disc and ceased to rotate (Fig.1D-H, 26-33h, Fig.S2 and Movie  
 79 S2). This transition from spirals to asters, theoretically predicted for active systems(30),  
 80 correlated with an increase of total cell number (Fig.S3), suggesting that cell density  
 81 controls it. Further proliferation led to the formation of cellular mounds at the centers  
 82 of the asters (Fig.1I,J and Movie S3).

83 To investigate how cell mounds could emanate from integer defects we set out to study  
 84 their structure and dynamics. First, we obtained average orientational and velocity  
 85 fields from spirals stabilized by inhibiting proliferation with Mitomycin-C right after  
 86 confluence (Fig.2A, Fig.S2, Movie S4 and Methods). The order parameter  $S$ , which  
 87 measures the degree of orientational order, was minimal at the discs' center and  
 88 increased towards their boundaries (Fig.2B,C and Methods). The angle  $\psi$  between  
 89 local orientation and the radial direction was  $85\pm 4^\circ$  ( $N=12$ , Fig.S4 and Methods). Actin  
 90 fibers in spirals, fluorescently-labelled with SiR-actin (Methods), showed a comparable  
 91  $\psi$  distribution (Fig. S5 and Movie S5). We used particle image velocimetry (PIV) to  
 92 measure the velocity field within the cell monolayers (Methods). Near the boundaries,

cell velocity was maximal at  $27 \pm 7 \mu\text{m/h}$  and, although it was dominantly azimuthal, as the direction of cell migration (Fig.2A), its radial component was non-vanishing (Fig.2B,C,  $N=12$ ). The angle  $\beta$  between local orientation and velocity was thus not null,  $\beta = 23 \pm 5^\circ$  (Fig.S4,  $N=12$ ), contrary to the general behavior of passive liquid crystals under shear(5). The role of active dynamics in the cellular arrangements was also evidenced by inhibiting myosin-driven contractility with Blebbistatin (Methods), which had a significant impact on the spirals' shape. Although rotation persisted,  $\psi$  decreased to  $55 \pm 5^\circ$  ( $N=9$ ), closer to the aster arrangement, and consequently, the radial velocity increased (Fig.S6).

Above  $\sim 3 \cdot 10^5 \text{ cells/cm}^2$  ( $N=13$ ), C2C12 cells formed stable asters (Fig.2D, Fig.S2 and Movie S5). Like in spirals,  $S$  increased towards the boundaries but both orientation and velocity were strictly radial (Fig.2D-F and Fig.S4). The radial velocity component (Fig.2E,F) was similar to that in spirals (Fig.2B,C). However, in asters, cells at the periphery remained almost immobile (Fig.2D and Movie S6). We thus suspected that the radial velocity originated from coherent actin flows. To show this, we fluorescently-labelled actin in asters with SiR-actin (Methods). PIV of fluorescence images revealed a radial velocity profile similar to the one observed by phase contrast microscopy (Fig.2E,F, Fig.S7 and Movie S7).

To elucidate the origin of the velocity and orientational patterns and infer their corresponding stress fields, we used a theoretical approach. Previous studies showed that bidimensional rotational flows can arise either from directional motion of dense active particles(26, 31–33) or from gradients in anisotropic active stresses (30, 34). We thus developed a 2D active nematic theory that accounted for both the directional motility of cells and the anisotropic active stresses. This theory is described elsewhere (35, 36). To constrain the values of our parameters, we fitted our theoretical results to the experimental azimuthal velocity and orientational order profiles of spirals with radii of 50, 100, and  $150 \mu\text{m}$  (Fig.3A-C). Solutions leading to cell accumulation in the center of the asters, as observed experimentally (Fig.1I,J), comprised equal contributions of directional motility and active anisotropic cytoskeletal stress gradients(35, 36). These solutions featured a compressive stress pattern that correlated with the cell density profile (Fig.3D-F).

To test our theory (Fig.3E,F), we characterized the nuclear volume and cell density, as internal rulers for external mechanical pressure(37). In asters, as expected, nuclear

126 volume decreased towards the center (Fig.3G,H), and cell density increased (Fig.3G,I).  
 127 To better assess the pressure at the core of the discs, we seeded myoblasts onto circular  
 128 fibronectin rings enclosing non-adhesive elastic fluorescent micro-pillars with an  
 129 elastic modulus  $E \sim 4\text{kPa}$  (Fig.3J, Fig.S8,9 and Methods). Eventually, myoblast  
 130 monolayers accommodated around the micro-pillars and compressed them (Fig.3K,L  
 131 and Movie S8). The orientation and velocity fields were similar than for asters on discs,  
 132 indicating that the pillars did not strongly affect the cellular arrangement (Fig.S10). We  
 133 quantified the pressure around the pillars over time from their deformation (Fig.3L,  
 134 Fig.S11 and Supplementary text). After  $\sim 30\text{h}$ , pressure plateaued at maximum values  
 135 between 1-4kPa, being smaller for larger radii (Fig.3M). The good agreement with our  
 136 theoretical results shows that the rotational flows in myoblast spirals result from an  
 137 interplay between directional cell motion and anisotropic active stress gradients, both  
 138 of which lead to compressive stresses in asters. We speculate that the pressure exerted  
 139 at the core of asters is the promoter of cells' displacement out of the monolayer's plane  
 140 and of the growth of cellular mounds.

141 To characterize the 3D organization of minimal cellular mounds (height  $\sim 40\mu\text{m}$ ), we  
 142 fluorescently labelled actin and imaged z-stacks for several hours (Fig.4A and  
 143 Methods). The 3D-averaged orientation and its azimuthal projection (Fig.4B and  
 144 Supplementary text) revealed a peripheral layer of ordered cells, all through the z  
 145 direction. Order was lost in the mounds' center. To evaluate how the cell arrangement  
 146 changed in the z direction, we extracted the radial distributions for the azimuthal angle  
 147  $\varphi$  and the zenith angle  $\phi$  at different heights (Fig.4C,D).  $\varphi$  exhibited a bimodal  
 148 distribution with peaks around 0 and  $90^\circ$ . Below  $\sim 10\mu\text{m}$ ,  $\varphi \sim 0^\circ$  dominated, whereas  
 149 above,  $\varphi \sim 90^\circ$  did (Fig.4C). Therefore, cells exhibited an aster arrangement at the  
 150 bottom of the mound, and a spiral at the top. This aster-to-spiral transition was reverse  
 151 of the transition in time discussed above (Fig.1D). We thus speculate that mound  
 152 growth correlates with a decrease in cell density, which triggers this transition.  
 153 Interestingly,  $\phi \sim 0^\circ$  at the top of the mound, whereas an oblique component,  $\phi \sim 45^\circ$ ,  
 154 appeared at the bottom (Fig.4D). This suggests that a vertical force, which could  
 155 promote further growth of the mounds, results from the integration of multicellular  
 156 stresses at the periphery.

157 Further evolution of myoblasts' mounds depended on whether cells could differentiate  
 158 or not. In the first case, myoblasts at the center of asters differentiated into globular

159 multi-nucleated myotube-like structures after 6 days, as evidenced by the expression of  
160 myosin heavy chain (Fig.4E,F). In contrast, differentiation induced by serum  
161 deprivation led to canonical elongated myotubes with a much broader spatial centering  
162 (Fig.S12). Thus, we conclude that the stress patterns generated by cellular aster  
163 arrangements can trigger localized differentiation.

164 During morphogenesis, however, proliferating cells are usually not differentiated(38).  
165 Accordingly, we sought to inhibit differentiation in order to promote and study tissue  
166 morphogenesis. As previously observed (39), C2C12 cells cultured at high-passage  
167 numbers (>50) were unable to differentiate and featured higher proliferation rates. In  
168 this case, cellular mounds grew further in height, up to hundreds of microns (Fig.4G  
169 and Fig.S13), reminiscently of multicellular aggregation in amoeboid colonies(40).  
170 Considering that minimal cell mounds presented a spiraling top (FIG.4A-D), we  
171 imagine a similar arrangement could be preserved while growing into larger  
172 protrusions. Consistently, we observed collective rotational flows around the  
173 protrusion's long axis (Fig.4H and Movie S9). These cellular structures were strictly  
174 dependent on confinement provided by the micropattern, as spontaneous degradation  
175 of the surrounding non-adhesive coating provoked their collapse (Movie S9). Thus, we  
176 conclude that minimal spiraling mounds (Fig.3A) can evolve into cylindrical vortices  
177 (Fig.4H,I), provided that their shape, growth and dynamics remain constrained by an  
178 integer topological defect.

179 In summary, our findings show how topological defects control the evolution of  
180 myoblast monolayers by localizing differentiation and steering morphogenesis. We  
181 foresee that topological defects could control multiple cell fate decisions and  
182 morphogenetic movements during development.

183

## 184 **Funding**

185 P.G. acknowledges support from the Human Frontiers of Science Program (LT-  
186 000793/2018-C). AR acknowledges funding from SystemsX RTD program EpiPhysX,  
187 the Swiss National Fund for Research Grants N°31003A\_130520, N°31003A\_149975  
188 and N°31003A\_173087, and the European Research Council Consolidator Grant N°  
189 311536.

## 190 **Author contributions**

191 P.G and A.R designed the research. P.G performed the experiments. C.B-M and K.K  
192 developed the theoretical model. All authors analyzed the data and participated in  
193 writing the manuscript.

## 194 **Competing interests**

195 Authors declare no competing interests.

## 196 **Data and materials availability**

197 All data is available in the main text or the supplementary materials. High resolution  
198 movies, as well as the codes used for analyzing 3D orientational fields will be available  
199 upon reasonable request.

200

201



# 202 **Figures**

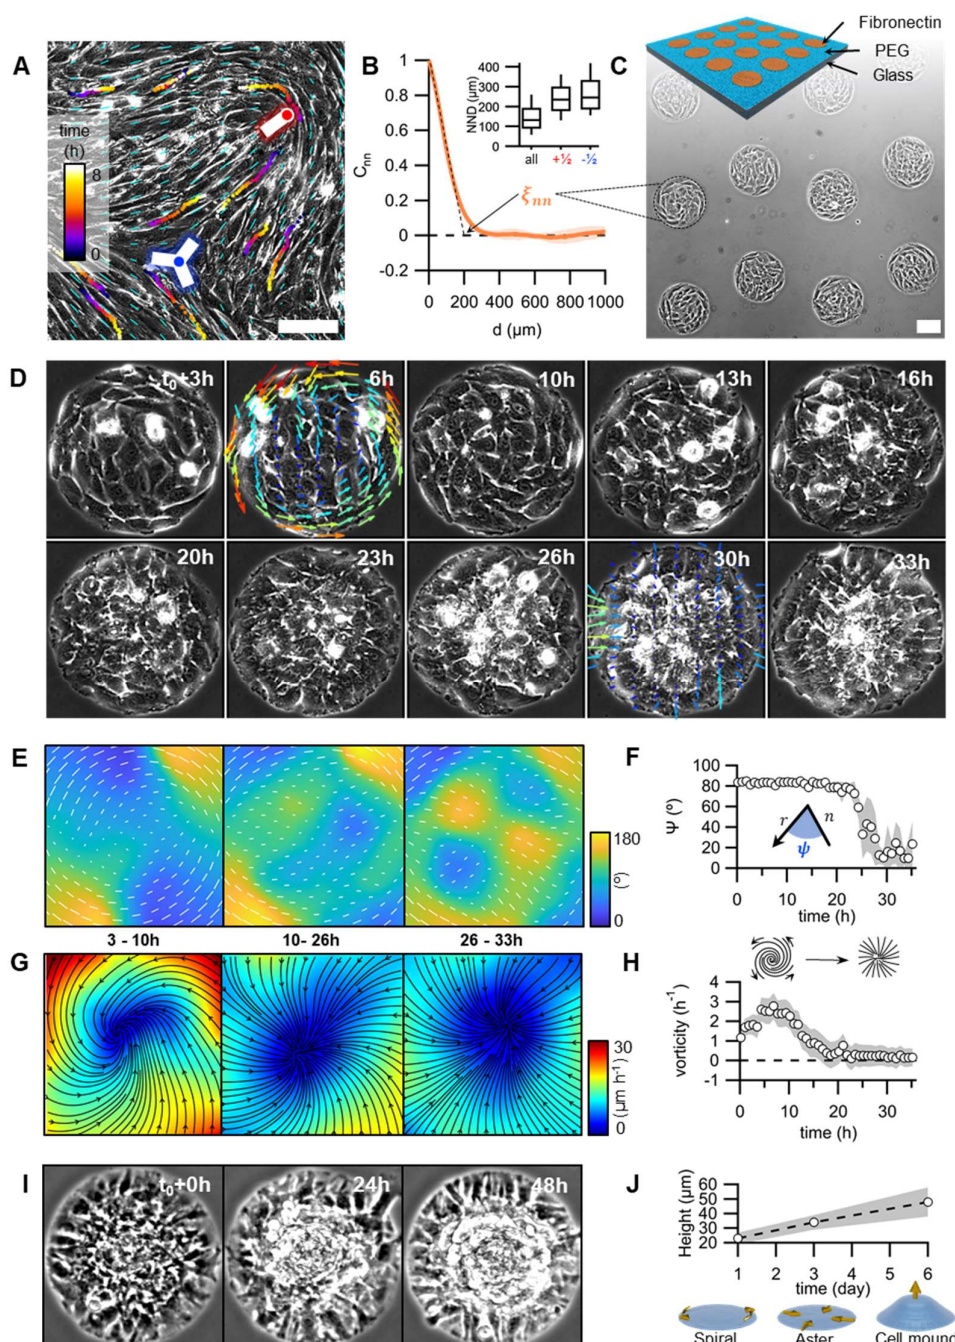

203

204 **Figure 1. Myoblasts arrange into integer topological defects on circular**  
 205 **micropatterns.** (A) Phase contrast image of a confluent myoblasts monolayer. Cyan  
 206 dashes indicate the orientational field. Positions of half-integer topological defects are  
 207 shown (blue dot,  $s=-1/2$ ; red dot,  $s=+1/2$ ). Trajectories of single cells are depicted with  
 208 color gradients. (B) Spatial autocorrelation function of the orientational field,  $C_{nn}$ .  $\xi_{nn}$   
 209 is the nematic correlation length. Inset: nearest neighbor distance (NND) between



210 topological defects. **(C)** Scheme of the micro-patterned surface and corresponding  
 211 phase-contrast image with confined myoblasts ( $r=100\mu\text{m}$ ). **(D)** Time series of a single  
 212 myoblast disc ( $r=100\mu\text{m}$ ). Time=0 at confluence. Velocity field is shown for 6 and 30h  
 213 ( $v_{\text{max}}=30\mu\text{m/h}$ ). **(E)** Time-averaged orientational field calculated from D. Vectors and  
 214 colormap depict local cellular orientation. Vector length corresponds to the local degree  
 215 of order  $S$ . **(F)** Mean value of angle  $\psi$  between the local orientation and the radial  
 216 direction over time ( $N=12$ ). **(G)** Time-averaged flow field calculated from D. Flow  
 217 directions are shown as black streamlines. The colormap depicts the local average  
 218 velocity. **(H)** Average vorticity over time ( $N=12$ ). **(I)** Time series of myoblast asters  
 219 ( $r=100\mu\text{m}$ ) forming mounds **(J)** Average height of myoblast assemblies with time. Scale  
 220 bars,  $100\mu\text{m}$ .

221

222

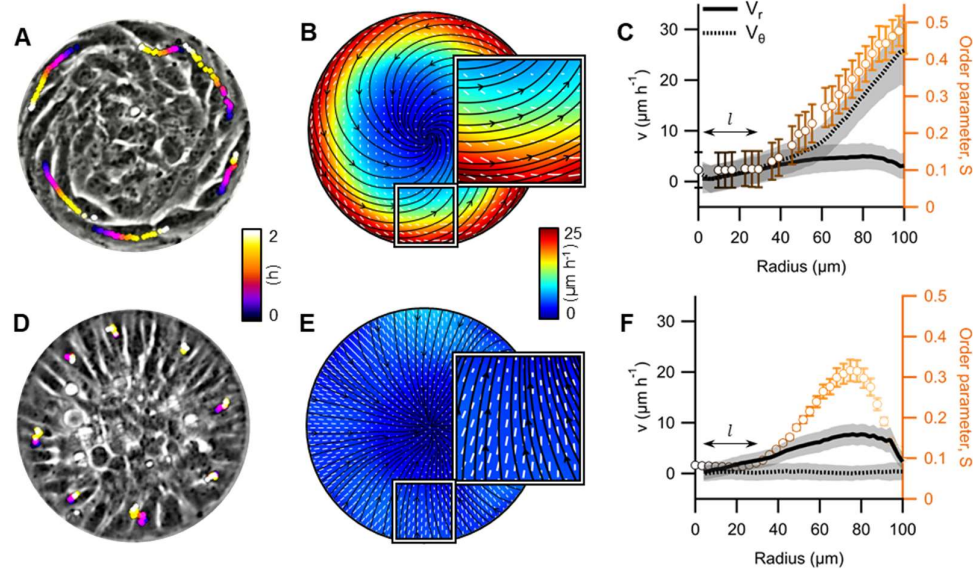

**Figure 2. Cellular spiral and aster configurations.** (A, D) Phase contrast images of spiral and aster arrangements, respectively. Colored dots depict the positions of some peripheral cells at different time points ( $r=100\mu\text{m}$ ). (B, E) Average velocity and orientation fields ( $N=12$  and  $43$ , for spirals and asters, respectively). Streamlines indicate the direction of the cellular flow. Colormap represents average velocity. White vectors indicate local cellular orientation. Vectors' length corresponds to the local degree of order  $S$  (C, F) Radial profiles of the azimuthal ( $v_\theta$ ) and radial velocity ( $v_r$ ) components, and of  $S$ .  $l$  depicts the size of the defect's core.

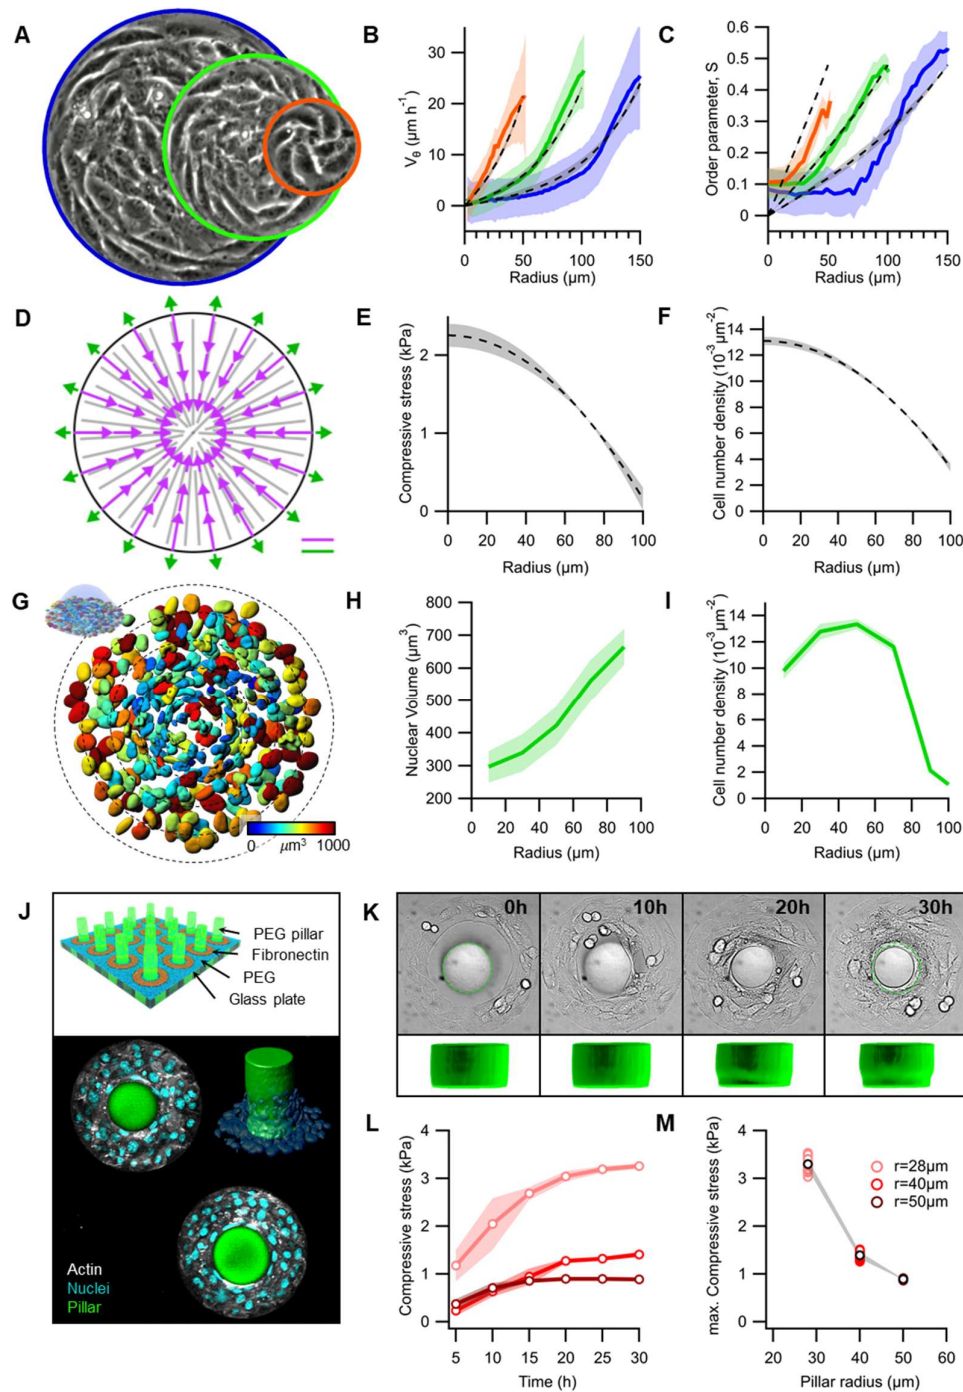

235

236 **Figure 3. Integer topological defects concentrate active stresses.** (A) Phase contrast  
 237 images of spiral defects. Radii are 50, 100 and 150  $\mu\text{m}$ . (B) Average radial profiles of  
 238 the azimuthal velocity ( $v_\theta$ ) and (C) the order parameter  $S$  ( $N=11, 12$  and  $5$  for  $r=50, 100$   
 239 and  $150\mu\text{m}$ , respectively). Theoretical fits are shown in dashed gray lines (solid  
 240 magenta curves in Fig. 10 of (36)). (D) Steady-state active forces in asters: internal  
 241 forces (purple) and forces at the boundary (green), see Sec. III of (36). (E) Steady-state

242 compressive stresses and **(F)** cell density profiles in asters (solid magenta curves in  
 243 Fig.11a and 11b of (36), respectively). **(G)** Nuclei at the base of a cellular mound  
 244 ( $r=100\mu\text{m}$ ). The colormap indicates the nuclear volume. **(H)** Radial profile of average  
 245 nuclear volume and **(I)** average cellular density ( $N=10$ ). **(J)** Scheme (top), fluorescence  
 246 confocal composite and 3D rendering of the pillar constriction experiment (cellular  
 247 ring,  $r_{\text{ext}}=125\mu\text{m}$ ). **(K)** Time-series showing the constriction of a pillar. Dashed line  
 248 depicts the initial size of the pillar's base ( $r=40\mu\text{m}$ ). 3D rendering of the pillar is shown  
 249 below. **(L)** Compression over time for pillars with different radii. **(M)** Maximum  
 250 compression vs pillar radii. Scale bars,  $100\mu\text{m}$ .

251

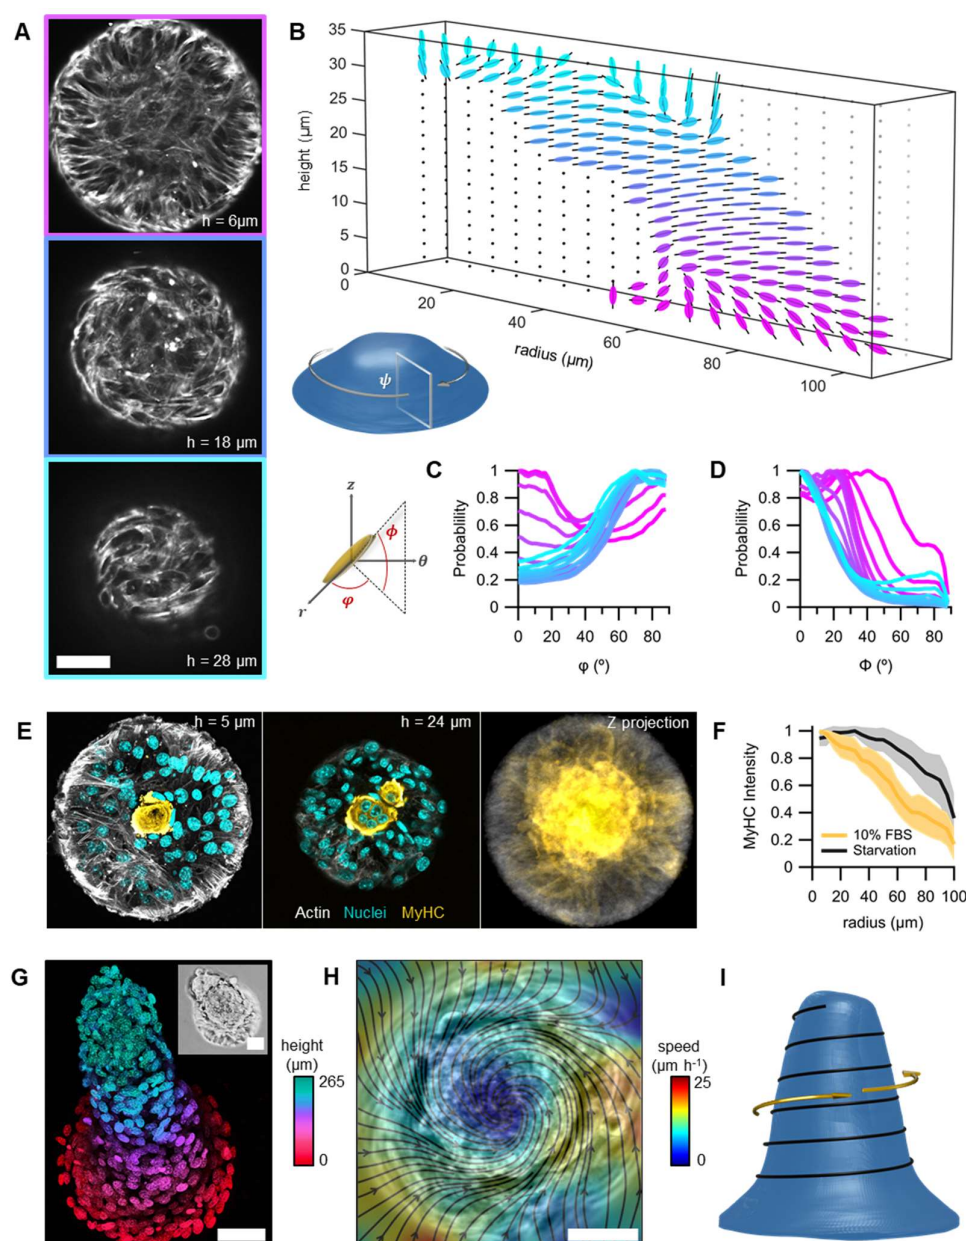

252

253 **Figure 4. Topological defects organize 3D growth and differentiation.** (A) Confocal  
 254 sections of an actin-labelled cell mound. (B) Average section of the 3D orientational  
 255 field. (C, D) Histograms of the angles  $\varphi$  and  $\Phi$ , respectively, for different heights. (E)  
 256 Confocal sections showing the preferential position for myosin heavy chain (MyHC)  
 257 expression ( $r=100\mu\text{m}$ ). Left panel corresponds to the first layer of cells. Center panel  
 258 corresponds to the midplane, displaying a multinucleated myotube-like structure. Right  
 259 panel shows the maximum projection of MyHC intensity ( $N=43$ ). (F) Radial profiles  
 260 of averaged MyHC intensity under different conditions. (G) Z-projection of a nuclei-  
 261 labelled cellular protrusion ( $r=100\mu\text{m}$ . Inset, phase contrast). (H) Average flow field

262 from a cellular protrusion ( $r=100\mu\text{m}$ , phase contrast). (I) Proposed orientational field  
263 (black line) in 3D cellular nematic protrusions. Scale bars,  $50\mu\text{m}$ .

264



## 265 **Materials and Methods**

### 266 **Cell culture and drug treatments**

267 C2C12 mouse myoblasts were cultured in DMEM media containing 4500mg/L  
268 glucose, 1mM sodium pyruvate (Life Technologies) and supplemented with 10% Fetal  
269 bovine serum (FBS), 100units/mL penicillin and 100µg/mL streptomycin. Cells were  
270 maintained at 37°C under 5% CO<sub>2</sub> and they were not allowed to become confluent.  
271 Maximum passages were kept below 20. For starvation conditions, used to induce  
272 differentiation, we supplemented the same DMEM media with 2% horse serum instead  
273 of 10% FBS.

274 For inhibiting differentiation, C2C12 cells were used after 50-60 passages, as  
275 previously reported(39). The cell batch was amplified and snap-frozen for future  
276 experiments.

277 For inhibiting proliferation, cells were treated with Mitomycin-C (Sigma) at 10µM for  
278 1h at 37°C, then washed away and replaced by fresh medium. Imaging data were  
279 acquired up to 10h after treatment with Mitomycin-C, to avoid toxic effects(41).

280 For inhibiting contractility (myosin ATPase), cells were treated with Blebbistatin  
281 (Sigma) at 17µM.

282 In all treatments, DMSO concentration was kept below 10<sup>-3</sup>%v/v.

### 283 **Fluorescence labelling and imaging**

284 For fluorescence immunostaining of myosin heavy chain, cells were fixed with 4%  
285 paraformaldehyde (Sigma) for 30min, permeabilized for 10min with 0.1% Saponin  
286 (Sigma) while blocked with 0.1% bovine serum albumin (BSA, Sigma). Finally, fixed  
287 cells are incubated 1h at room temperature with *Myosin* 4 Monoclonal Antibody  
288 conjugated with Alexa Fluor 488 (MF20, Thermofisher) at 5µg/mL (1:100 dilution)  
289 and 0.1% BSA.

290 Actin was labelled with SiR-Actin, conjugated with Alexa Fluor 647 (Spirochrome).  
291 Concentrations used were 1µM (30min incubation) for fixed samples and 250nM (6h  
292 incubation) for live imaging.

293 Cell nuclei were labelled after fixation with Hoechst 33342 (Thermofischer) at  
294 10µg/mL (5min incubation).

Fixed samples were imaged by using a Nikon Eclipse Ti-E microscope equipped with a Nikon A1 confocal unit. We employed x40/x60 water/oil immersion objectives (NA 1.15/1.4). The microscope was operated with NIS-Elements software. A Zeiss LSM 710 upright confocal microscope (40x objective, NA 0.75) was used for imaging the top and exterior of cellular mounts. The microscope was operated with Leica Application Suite software.

### **Time-lapse imaging**

Time-lapse imaging was performed with an inverted microscope Nikon Ti-E installed into a thermostatically-controlled chamber (Life Imaging Technologies) and equipped with a micro-incubator for thermal, CO<sub>2</sub> and humidity control (OKOlabs). The microscope was also equipped with an automated stage and a Yokogawa CSU-W1 spinning disk unit. Image acquisition was performed with an Andor Zyla 4.2 Plus camera, operated with Slidebook Software. We performed fluorescence (60x lens, NA 1.4), phase contrast (10/20x objectives, NA 0.3/0.45) and differential interference contrast (DIC) imaging (20x lens, NA 0.45). 4D time-lapse was used for scanning actin-labelled cell mounds (60x lens, NA 1.4) and for the pillar compression experiments. The latter combined DIC and confocal fluorescence modes (20x lens, NA 0.45). Typically, we acquired 12 images/h for at least 10h.

### **Substrate functionalization and micro-patterning**

To prepare surfaces for micropatterning, glass bottom dishes (Mattek) were first activated using a plasma cleaner (Harrick Plasma, PDC-32G) for 3min. Then, the glass surface was treated with a 0.1mg/mL poly-lysine (PLL, Sigma) solution for 30min, then washed with HEPES buffer (pH=8.4). A solution of 50mg/mL mPEG (MW 5,000) - succinimidyl valerate (SVA) (Laysan Bio) was applied to passivate the surface for 1.5h, and then washed out with PBS. Substrates were normally used after preparation although they can be kept under PBS for 1-2 weeks at 4°C.

Micropatterns were generated by using a UV-activated mPEG-scission reaction, spatially controlled by the system PRIMO (Alvéole)(42), mounted on an inverted microscope Nikon Eclipse Ti-2. In the presence of a photo-initiator compound (PLPP, Alvéole), the antifouling properties of the PEGylated substrate are tuned by exposure to near-UV light (375nm). After illumination (1,200mJ/mm<sup>2</sup>) through a 20x objective PLL is exposed. After rinsing with PBS, fibronectin (Sigma) was incubated at 50µg/mL

at room temperature for 5min in order to coat the PEG-free PLL motifs with the cell-adhesive protein. The excess of fibronectin was washed out with PBS. Patterned substrates were always used right after preparation. PBS was finally replaced by medium and a suspension of cells was added at densities of  $\sim 1 \cdot 10^5$  cells/cm<sup>2</sup>. Samples were kept in an incubator at 37°C and 5% CO<sub>2</sub>. After 30min, non-adhered cells were washed out.

### **Pillar constriction experiment**

First, we fabricated mPEG-based fluorescent soft hydrogel micropillars. To this end, a “polymerization solution” was activated by near UV light with the system PRIMO (Alvéole), by inducing the photo-polymerization of pillars through illumination of our substrates with full circle motifs (see Fig. S8).

1- Fluorescently-labelled Acrylate(AC)-mPEG: Fluoresceinamine (Sigma) was dissolved at 0.1mg/mL in HEPES buffer solution (pH=8.3) and mixed with an equal volume of a 50mg/mL AC-PEG (MW 2,000)-SVA (Laysan Bio) solution, which was prepared in the same buffer. The resulting mixture was vortexed and let sit at room temperature in the dark for 1h.

2- Polymerization mixture: to prepare 100 µL of a 5% PEG hydrogel we mixed 50µL of a 10% solution of 4arm-PEG (MW 20,000)-AC (Laysan Bio) in water, 25µL of fluorescently-labelled AC-mPEG, 24µL of water and 1µL of 3-(Trimethoxysilyl)propyl methacrylate (Sigma). The water employed was double-distilled and it was degassed by flowing Argon for 5min.

3- Substrate preparation: a glass bottom dish (Mattek) was first activated with a plasma cleaner (Harrick Plasma, PDC-32G) for 3 min and a PDMS stencil (thickness, 300 µm, Alvéole) with 4 small circular wells (r=2mm) was placed onto the glass substrate. 30-50µL of the polymerization mixture was added into each of the circular wells, which were then covered by a polyethylene film, 100µm thick. Micro-pillars were fabricated right after.

4- Fabrication of micro-pillars: the PRIMO system (Alvéole) was used to fabricate micro-pillars ~300µm high. To this end, we illuminated the upper base of the glass substrates with a 10x objective. Full circle motifs (r=75µm) of UV-light (100-200mJ/mm<sup>2</sup>) were projected. After photo-polymerization, the remaining solution was washed out and rinsed with PBS.

359           5- Micro-patterning: we functionalized the glass substrate with PEG and  
360 generated ring micro-patterns around the micropillars by using the same protocols  
361 above (see Section “Substrate functionalization and micro-patterning”). Here, ring  
362 motifs ( $r_{\text{int}}=75\mu\text{m}$ ,  $r_{\text{ext}}=125\mu\text{m}$ ) were manually located with the software Leonardo  
363 (Alvéole). Subsequently, substrates were incubated with fibronectin and finally, cells  
364 were seeded, also as explained above.

### 365 **Fabrication of PEG hydrogel disks and measurement of their elastic properties**

366 In order to characterize the elastic modulus of the PEG hydrogels we prepared  $300\mu\text{m}$   
367 films of 4arm-PEG (MW 20,000) with different densities (20, 10, 5 and 2.5%w/v). The  
368 protocol employed for the preparation of the “polymerization mixture” was the same  
369 as the one above (see Section “Pillar constriction experiment”). However, in this case  
370 we added our “polymerization solution” in the circular wells (14mm diameter, 1mm  
371 high) of glass-bottom dishes (Mattek). We covered the well with a glass coverslip to  
372 ensure obtaining a flat surface. Subsequently, we polymerized the whole content of the  
373 wells by illuminating the samples 1min in a UV-curing chamber (375nm, Asiga Flash),  
374 obtaining hydrogel disks 14mm in diameter and 1mm thick. After polymerization, gels  
375 were rinsed with double-distilled water kept wet at  $4^{\circ}\text{C}$ .

376 Force-displacement curves were obtained by using a FT-S100 micro-force sensing  
377 spherical probe ( $r=250\mu\text{m}$ , Femtotoools). We performed 9 indentations for each gel at  
378  $2\mu\text{m/s}$  and obtained Force vs Displacement curves (Fig S9, A, B). Calibration hydrogels  
379 (4 and 50kPa, Petrisoft) were employed to complete the measurements. The elastic  
380 modulus of the lowest density gel (2.5%) was assumed to be 4kPa (Fig. S9, C).

### 381 **Image analysis**

#### 382 Flow, orientation and associated quantities

383 Tracer-free velocimetry analysis of the flows in the cell monolayers was performed  
384 with a public domain particle image velocimetry (PIV) program implemented as an  
385 ImageJ plugin(43). Manual Tracking ImageJ plugin was used to manually track  
386 trajectories of cells. The cell shape 2D orientational field  $\mathbf{n}$  was extracted by using the  
387 imageJ plugin OrientationJ, which is based on the structure tensor method(44). The  
388 angle  $\theta$  is the local orientation of  $\mathbf{n}$  with respect to a fixed axis. The amplitude of  $\mathbf{n}$ ,  
389 named coherency C, was also extracted from the imageJ plugin OrientationJ. 3D cell-  
390 shape orientation analysis was based on the same method but considering intensity

391 gradients in 3D (see Supplementary text, below). It was implemented as a MatLab  
392 function. Further analysis from velocimetry and orientation data were also performed  
393 with custom-written Matlab codes.

394 We used the average vorticity to assess the rotational component of the flow field. Local  
395 vorticity was calculated as the curl of the (2D) velocity vector field obtained from PIV:

$$396 \quad \omega = \frac{\partial v_y}{\partial x} - \frac{\partial v_x}{\partial y}.$$

397 The spatial nematic autocorrelation function  $C_{nn}$  (Fig.1B and Fig. S1C) was calculated  
398 from each orientational field position like

$$399 \quad C_{nn}(d) = 2 \left( \langle \cos^2(\theta(r) - \theta(r + d)) \rangle - \frac{1}{2} \right),$$

400 where  $\theta$  is the local orientation of  $\mathbf{n}$  with respect to a fixed axis. We considered  $C_{nn}$  at  
401 timepoints within one-hour period for temporal averaging. The characteristic nematic  
402 length  $\xi_{nn}$  was extracted from the intersection of the initial linear decay and  $C_{nn}=0$ .

403 The angle  $\psi$  was obtained for each position from the scalar product between the  
404 orientation vectors  $\mathbf{n}$  and their corresponding radial direction vectors  $\hat{r}$ . The angle  $\beta$   
405 was obtained for each position from the scalar product between the orientation vectors  
406  $\mathbf{n}$  and their corresponding velocity vectors  $\vec{v}$ . Note that both angles  $\psi$  and  $\beta$  were  
407 considered only if the coherence of their corresponding orientation vectors(44)  
408 presented values superior than a certain coherence threshold value, which is specified  
409 in each figure caption. Mean values for  $\psi$  and  $\beta$  were obtained from the Gaussian fits  
410 of their corresponding probability distributions.

411 To obtain the orientational order parameter  $S$ , we first computed the nematic order  
412 tensor  $Q$  from the orientation field  $\mathbf{n}$ . Specifically, the components of the nematic tensor  
413 were

$$414 \quad Q_{xx} = 2C \cos(2\theta)$$

$$415 \quad Q_{xy} = 2C \sin(2\theta),$$

416 where  $C$  corresponds to the coherency and  $\theta$  is the local orientation of  $\mathbf{n}$  with respect  
417 to a fixed axis. The nematic order parameter  $S$  was calculated from the time-averaged  
418 components of the nematic tensor  $Q$  for each position like

$$S(x, y) = \frac{\sqrt{\langle Q_{xx} \rangle_{(x,y)}^2 + \langle Q_{xy} \rangle_{(x,y)}^2}}{2},$$

where the brackets  $\langle \rangle$  denote a time average over a local position in the space matrix.

#### Nearest neighbor distance between half integer defects

For the detection of half-integer defects for the nearest neighbor analysis in Fig. 1B we build up on previously used algorithms. First, we define as defect areas, the regions where the parameter  $\sqrt{\langle \cos 2\theta \rangle^2 + \langle \sin 2\theta \rangle^2}$  was below a threshold value. The brackets  $\langle \rangle$  denote an average over a local region. In order to assess their topological strength, we calculated the winding number  $\frac{\sum \Delta\theta}{2\pi}$ , where  $\sum \Delta\theta$  is the accumulated rotation of the orientational field around these low-order regions (45). Finally, for the nearest neighbor distance analysis, we compared all the distances between defects and selected the minimum values corresponding to each pair.

#### Volume segmentation of nuclei and pillars

Segmentation of nuclei and pillars, as well as the quantification of their volume were performed with Imaris software (Oxford Instruments). Nuclear volume and nuclear density profiles were calculated with custom-written Matlab codes.

#### Calculation of errors

In general, error bars correspond to the standard error of the mean (SE), calculated like  $\frac{SD}{\sqrt{N}}$ , where SD is the standard deviation obtained considering all timepoints per experiment, including different replicates. N corresponds to the number of replicates. Thus, note that we did not use temporal averaging for the calculation of the errors.

Errors associated to the mean values of the angles  $\psi$  and  $\beta$  were calculated as  $\frac{\sigma}{\sqrt{2N}}$ , where  $\sigma$  is the width (SD) of the gaussian function  $G(x) = Y_0 + \frac{1}{\sigma\sqrt{2\pi}} e^{-\frac{1}{2}\left(\frac{x-x_0}{\sigma}\right)^2}$  fitted to the angles' probability distributions.



## 444 **Supplementary text**

### 445 1. Linear elastic cylinder subjected to a uniform pressure

446 In the following, we derive the theoretical equation used to quantify the cellular forces  
447 exerted on deformable elastic pillars.

448 The geometry of pillars is approximated by a cylinder of radius  $R$  and height  $h$ . Due to  
449 the symmetries of the cylinder, we focus on axisymmetric solutions, (i.e. independent  
450 on the azimuthal coordinate  $\theta$ ) and use cylindrical coordinates  $(r, \theta, z)$ . Furthermore,  
451 we consider that our deformable elastic pillars behave as a linear elastic material (Fig.  
452 S9, A), so that the stress tensor  $\sigma$  obeys

$$453 \quad \sigma_{\alpha\beta} = \frac{E}{1+\nu} U_{\alpha\beta} + \frac{E\nu}{(1+\nu)(1-2\nu)} U_{\gamma\gamma} \delta_{\alpha\beta},$$

454 where the symmetric part of the strain tensor is  $U_{\alpha\beta} = \frac{\partial_\alpha u_\beta + \partial_\beta u_\alpha}{2}$  with  $\mathbf{u}$  being the  
455 displacement vector. The material parameters are the elastic modulus  $E$  and the poisson  
456 ratio  $\nu$ .

457 The force balance equation reads

$$458 \quad \partial_\beta \sigma_{\alpha\beta} = 0,$$

459 as there are no bulk forces applied on the pillars.

460 To complete our description, we need to specify the boundary conditions. On the lateral  
461 surface of the cylinder, we consider that cells exert a uniform compressional stress  $-P$ ,  
462 so that  $\sigma_{rr}(r = R) = -P$  and  $\sigma_{zr}(r = R) = 0$ . On the bottom surface of the cylinder,  
463 we consider vanishing displacement in the  $z$ -direction  $u_z(z = 0) = 0$ . On the bottom  
464 surface, the cylinder is allowed to slide freely in the radial direction, so that  $\sigma_{zr}(z =$   
465  $h) = 0$ . On the upper surface of the cylinder, we consider stress free conditions  
466  $\sigma_{zz}(z = h) = 0$  and  $\sigma_{rz}(z = h) = 0$ .

467 A steady-state solution to the above problem, corresponds to a displacement field  $\mathbf{u}$   
468 with  $u_r = U_r^0$ ,  $u_\theta = 0$ , and  $u_z = U_z^0$ . In this case, the non-vanishing components of  
469 the stress tensor are:

$$470 \quad \sigma_{rr} = \sigma_{\theta\theta} = \frac{E}{1+\nu} U_r^0 + \frac{E\nu}{(1+\nu)(1-2\nu)} (2U_r^0 + U_z^0).$$

$$471 \quad \sigma_{zz} = \frac{E}{1+\nu} U_z^0 + \frac{E\nu}{(1+\nu)(1-2\nu)} (2U_r^0 + U_z^0).$$

472 By enforcing that  $\sigma_{zz}(z = h) = 0$  and  $\sigma_{rr}(r = R) = -P$ , we obtain the displacement  
473 field

$$474 \quad u_r = -\frac{(1-\nu)P}{E}r.$$

$$475 \quad u_z = \frac{2\nu P}{E}Z.$$

476 Rewritten in terms of the areal strain,  $\frac{\Delta A}{A} = \frac{2u_r(r=R)}{R}$ , reads

$$477 \quad P = -\frac{E}{2(1-\nu)}\frac{\Delta A}{A_0},$$

478 where  $\Delta A$  is the difference of cylinder base' areas after deformation and  $A_0$  is the area  
479 of the cylinder's base before deformation.

480 This equation was used to quantify the cellular forces exerted on deformable elastic  
481 pillars. The areal strain was calculated from the experimentally-measured pillars'  
482 volume like

$$483 \quad \left(\frac{\Delta A}{A_0}\right)_{exp} = \frac{V(t)-V_0}{A_0 \cdot h_c(t)},$$

484 where  $V$  corresponds to the segmented volume of the cylindrical pillar at a fixed height,  
485 typically 40 $\mu$ m, which was larger than the compressed height  $h_c$ . Temporal evolution  
486 of  $h_c$  was assessed manually from 3D volume renderings of the pillars (Fig. S11).  $V_0$   
487 and  $A_0$  correspond to the initial segmented volume and base area of the cylindrical  
488 pillar, respectively. The elastic modulus  $E$  was extracted from indentation  
489 measurements (Fig. S9). For the calculation of forces on the PEG pillars we considered  
490 PEG hydrogels to be incompressible, thus  $\nu = 0.5$ (46).

491

## 2. 3D director field from fluorescence confocal z-stacks

In the following, we explain the procedure to determine 3D director field  $\mathbf{n}$  from z-stacks of fluorescence images.

Let us consider a 3D intensity map  $I(x, y, z)$ , such as a z-stack of fluorescence images, where  $(x, y, z)$  represents the cartesian coordinates. First, using the Matlab function *interp3*, we interpolated the 3D intensity map  $I(x, y, z)$  so that the resolution of the  $z$  coordinate matched the resolution of the  $(x, y)$ -planes. Next, we used the Matlab function *imgaussfilt3* to apply a Gaussian filter with standard deviation  $\sigma_1$  on  $I(x, y, z)$ . This part eliminated small-wavelength fluctuations from the intensity map. For each pixel, we computed the gradient of the intensity map  $(\partial_x I, \partial_y I, \partial_z I)$  by using the Matlab function *imgradientxyz*. We computed the structure matrix, which is defined as

$$\mathcal{M} = \begin{pmatrix} \langle \partial_x I * \partial_x I \rangle & \langle \partial_x I * \partial_y I \rangle & \langle \partial_x I * \partial_z I \rangle \\ \langle \partial_y I * \partial_x I \rangle & \langle \partial_y I * \partial_y I \rangle & \langle \partial_y I * \partial_z I \rangle \\ \langle \partial_z I * \partial_x I \rangle & \langle \partial_z I * \partial_y I \rangle & \langle \partial_z I * \partial_z I \rangle \end{pmatrix},$$

where the brackets  $\langle \cdot \rangle$  denote a second Gaussian filter with standard deviation  $\sigma_2$ . We defined the traceless structure matrix as  $\bar{\mathcal{M}} = \mathcal{M} - \text{Tr}(\mathcal{M})\mathbb{I}/3$ , where  $\text{Tr}$  denotes the trace operator and  $\mathbb{I}$  denotes the identity matrix. For each pixel, the matrix  $\bar{\mathcal{M}}$  was diagonalized by the Matlab function *eig*. For each pixel, the three eigenvectors of  $\bar{\mathcal{M}}$  define, in general, an orthogonal basis. The eigenvector with the smallest eigenvalue represented the direction of smallest variation of the intensity map  $I(x, y, z)$  in the vicinity of the pixel  $(x, y, z)$ . We considered the director field  $\mathbf{n}$  parallel to the eigenvector with minimal eigenvalue. Note that, the orientation of  $\mathbf{n}$  was determined up to a sign, meaning that  $\mathbf{n} \rightarrow -\mathbf{n}$  were indistinguishable. We choose  $n_z$  to be positive. The amplitude of  $\mathbf{n}$  was set by the smallest eigenvalue of  $\bar{\mathcal{M}}$ . For each pixel, we computed the components of the nematic tensor field  $\mathbf{Q}$  in cylindrical coordinates, taking as the center the geometrical center of the confining domains. Finally, we averaged the components of the nematic tensor field  $\mathbf{Q}$  over time and experiments. In conclusion, the method presented two input parameters given by the standard deviations of two Gaussian filters, and outputted a nematic tensor field  $\mathbf{Q}$  from a 3D intensity map  $I(x, y, z)$ .

521 To construct Fig. 4B, we apply the above-mentioned routine with the input parameters  
 522  $\sigma_1 = 1$  px and  $\sigma_2 = 5$  px to actin-stained cell mounds (N=8) and obtained the averaged  
 523 nematic tensor field  $Q$  in cylindrical coordinates. We binned the data in the radial  
 524 direction so that 20 points are shown. To represent the data, we used the following  
 525 procedure. First, for each data point, we computed the eigenvectors and eigenvalues of  
 526 the binned nematic tensor field using *eig*. Next, for each data point, we constructed a  
 527 3D ellipsoid of revolution with the major axis proportional to the largest eigenvalue  
 528 and the minor axes proportional to the mean of the two lowest eigenvalues. For each z-  
 529 plane in Fig. 4B, only the 3D ellipsoids of revolution that had a trace of the binned  
 530 nematic tensor larger than the mean of each plane, were shown.

531

532

# Supplementary figures

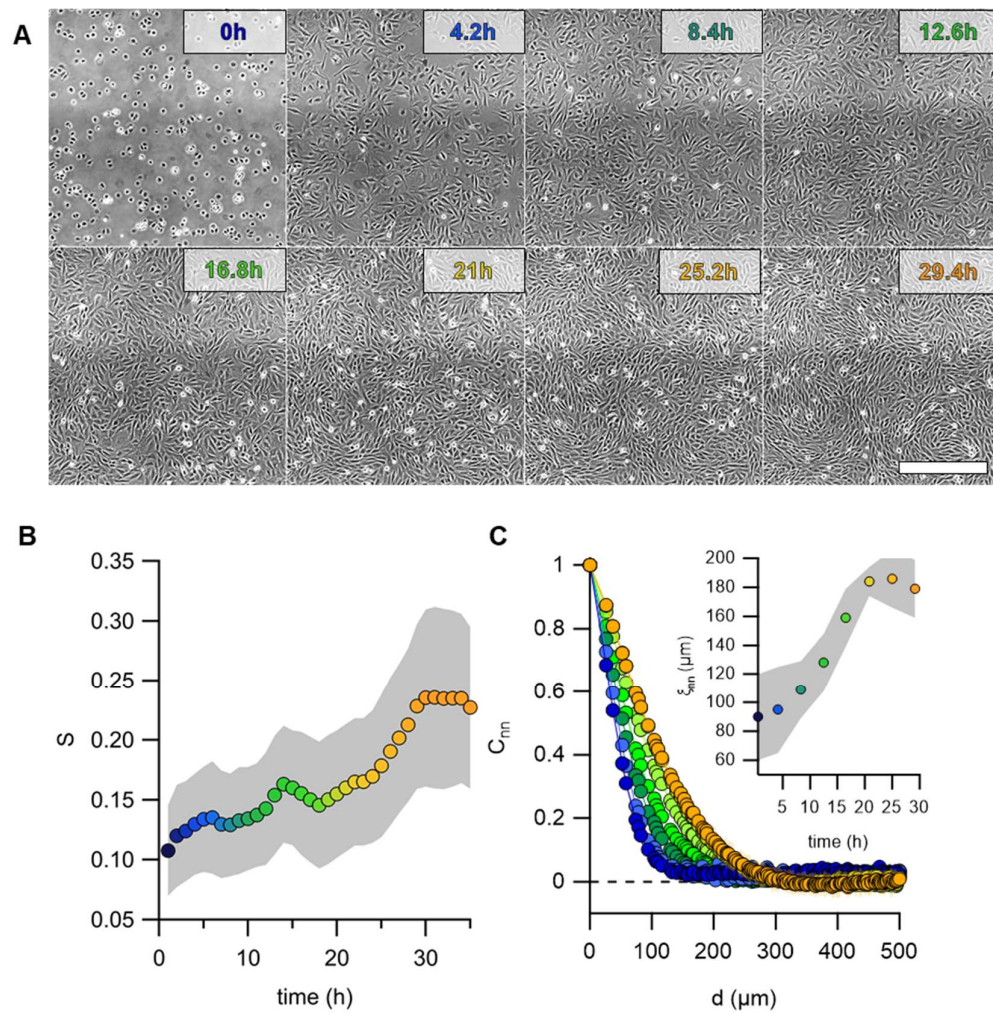

**Figure S1. Formation of a nematic cellular monolayer.** (A) Time series of a proliferating monolayer of C2C12 myocytes. Scale bar, 500μm. (B) Average order parameter  $S$  in function of time. (C) Temporal evolution of the spatial autocorrelation function  $C_{nn}$  and nematic autocorrelation length  $\xi_{nn}$  (inset).

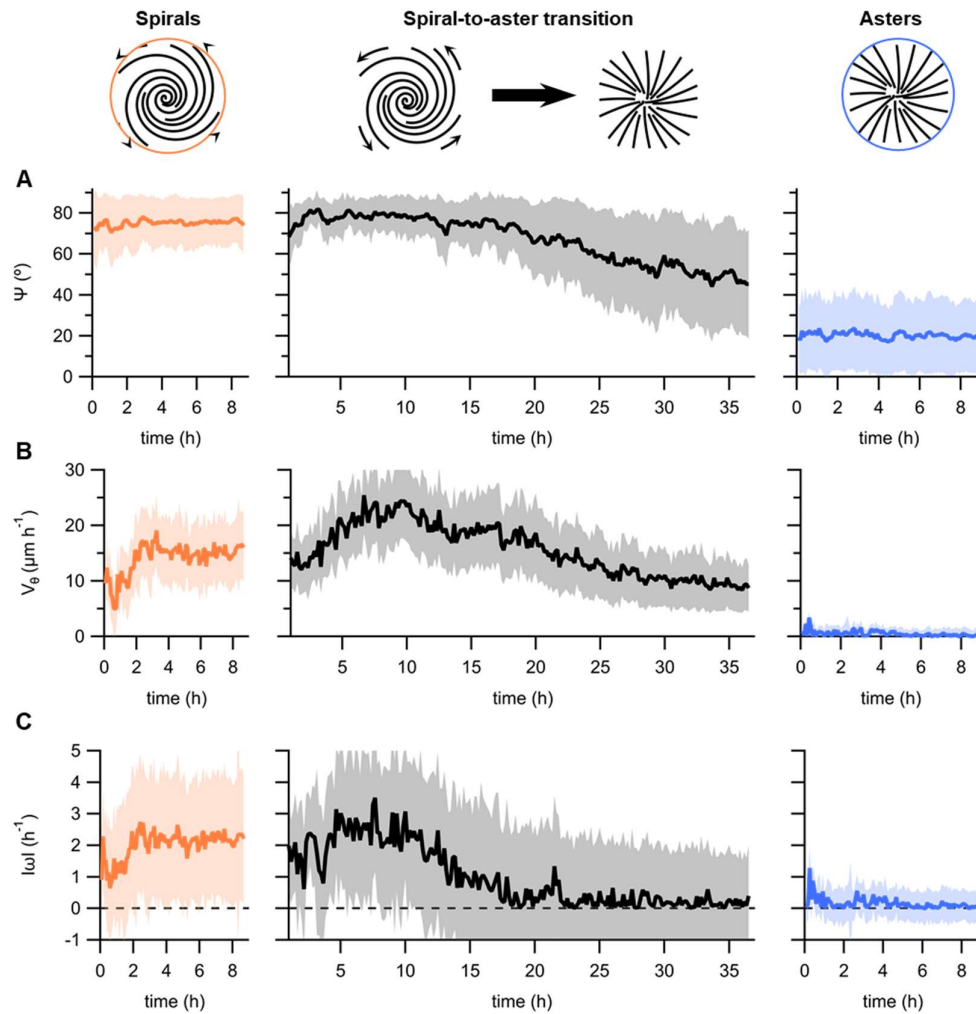

542

543 **Figure S2. Morphology and dynamics for spirals and asters.** Temporal evolution of  
 544 (A)  $\psi$ , (B) azimuthal velocity ( $v_\theta$ ) and (C) vorticity  $\omega$ , in spirals (orange,  $N=12$ ), during  
 545 the spiral-to-aster transition (black,  $N=12$ ) and in asters (blue,  $N=43$ ).

546



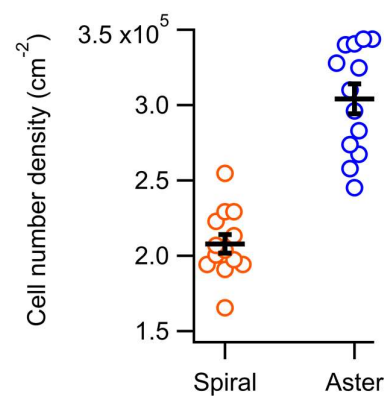

547

548 **Figure S3. Cell number density in spirals and asters.** N=13 both for spirals and  
 549 asters.

550

551

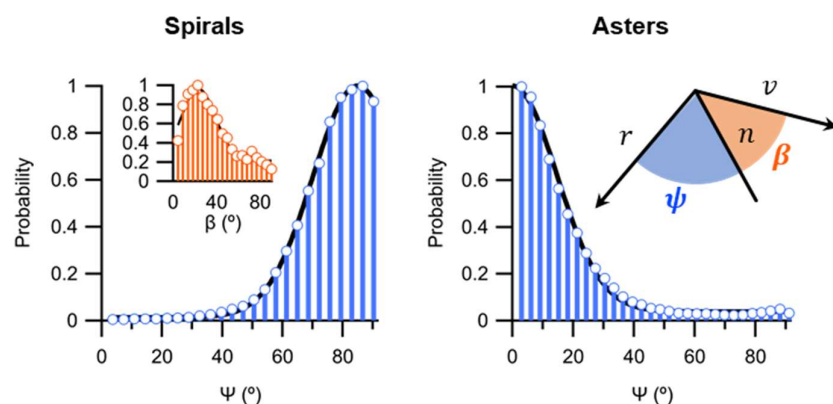

552

553 **Figure S4. Distribution of angles  $\psi$  and  $\beta$  and for spirals and asters.**  $\psi$  values (blue  
554 bars) are calculated from orientation vectors at distances  $r < 0.9R$  and  $r > 0.6R$ , being  $R$   
555 the radius of the islands, and with  $S > 0.3$ . For spirals,  $\beta$  values (orange bars) are  
556 calculated from all the vectors from the average velocity and orientational vector fields  
557 (Fig. 2B and E).  $N=12$  and  $43$ , for spirals and asters, respectively. Black lines  
558 correspond to Gaussian fits.

559

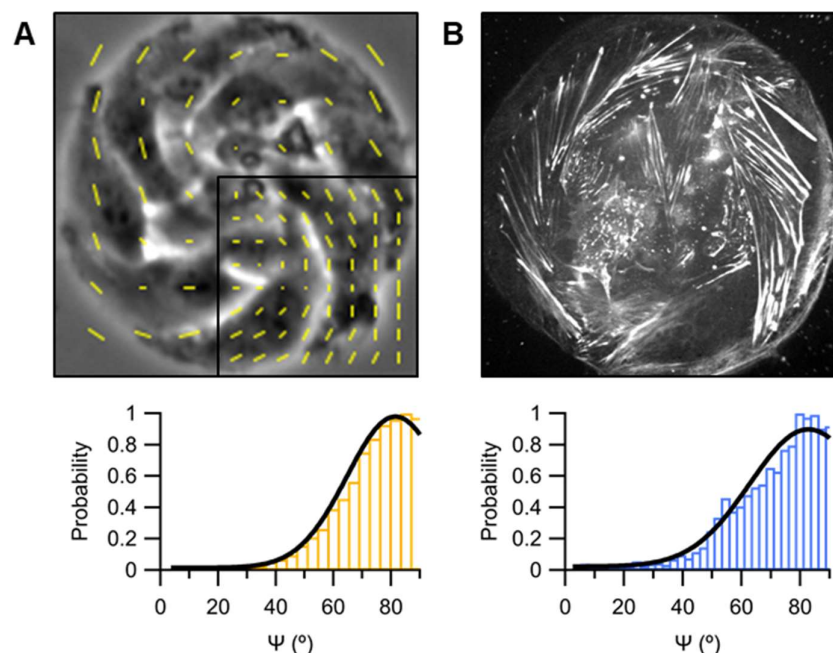

**Figure S5. Orientational field from cell-shape and actin fibers.** (A) Phase contrast image of a stabilized spiral ( $r=50\mu\text{m}$ ). Yellow vectors correspond to the local orientation. For clarity, all extracted vectors are only shown in the framed inside panel. (B) Confocal micrograph of the bottom plane of an F-actin-labelled stabilized spiral ( $r=50\mu\text{m}$ ). Bottom histograms show the distribution of the values for the angle  $\psi$  extracted from time-lapses represented by images in A ( $N=11$ ) and B ( $N=7$ ). Values considered correspond to vectors at distances  $r<0.95R$  and  $r>0.3R$ , being  $R$  the radius of the islands, and with  $S>0.4$ .

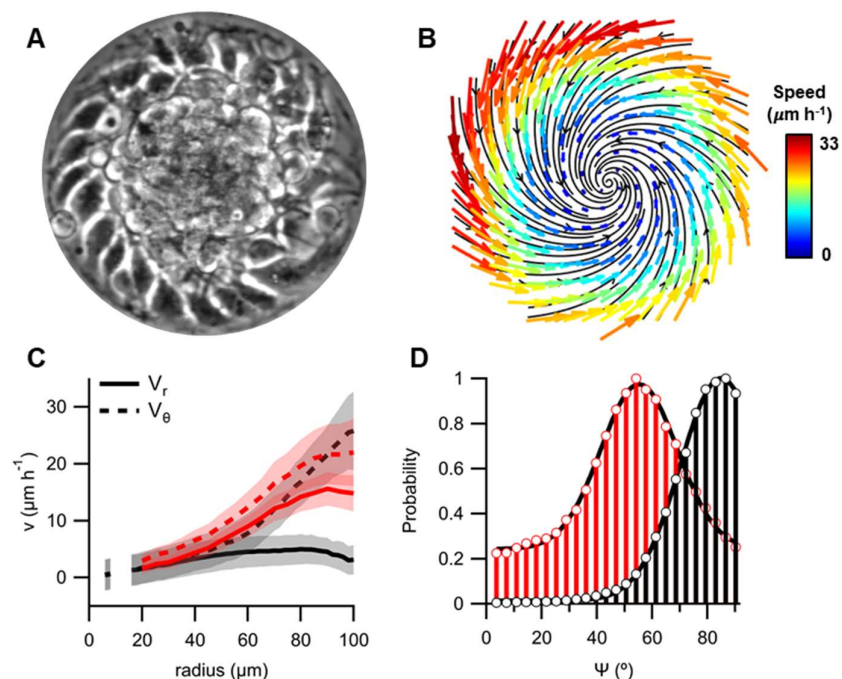

571

572 **Figure S6. Influence of myosin activity on spiral's morphology and dynamics. (A)**

573 Phase contrast micrograph of a Blebbistatin-treated spiral ( $r=100\mu\text{m}$ ). (B) Average flow

574 field ( $N=9$ ). (C) Radial profiles of the radial and azimuthal velocity components for

575 spirals, treated (red) or not treated (black) with Blebbistatin. (C) Radial profiles of the

576 radial and tangential velocity components. (D)  $\psi$  values for spirals, treated (red) or not

577 treated (black) with Blebbistatin. Values considered correspond to vectors at distances

578  $r < 0.9R$  and  $r > 0.6R$ , being  $R$  the radius of the islands, and with  $S > 0.3$ .

579

580

581

582

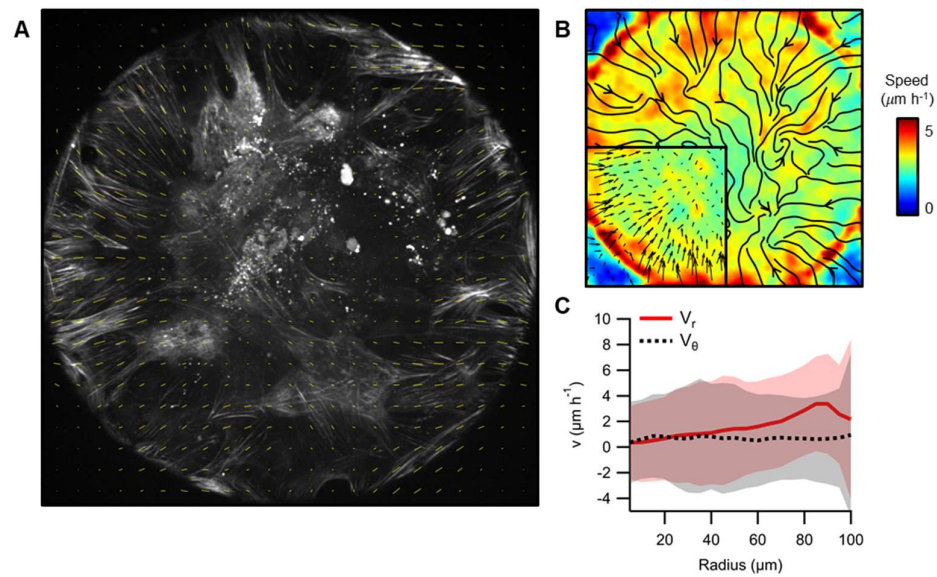

583

584 **Figure S7. Actin flows in asters.** (A) Confocal micrograph of an aster base ( $r=100\mu\text{m}$ ).  
 585 Filamentous actin was labelled with SiR-Actin. Yellow lines indicate the local average  
 586 orientation. (B) Average flow field ( $N=4$ ). Streamlines and vectors (inset) indicate the  
 587 direction of the actin flow. The colormap indicates the average speed. (C) Radial  
 588 profiles of the radial (red) and azimuthal (black) velocity components.

589

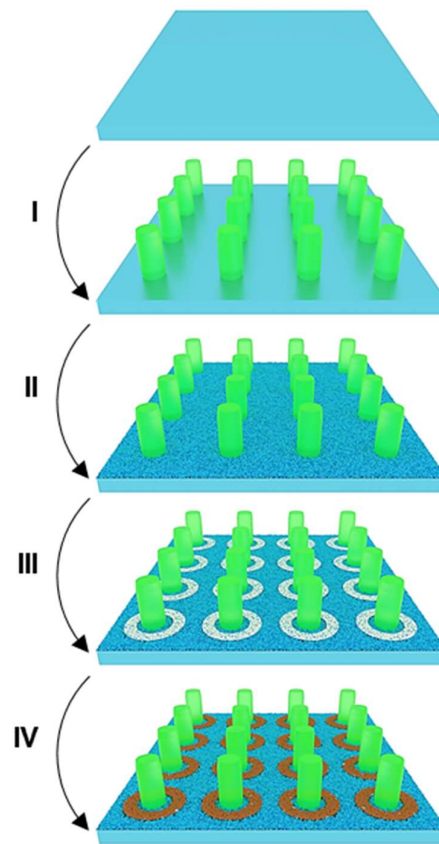

**Figure S8. Micro-pillar compression experiment.** Schematics of the protocol employed to fabricate cell-adhesive rings enclosing passive fluorescent hydrogel micro-pillars. After activation of the glass substrate, micro-pillars were fabricated by illuminating a photo-polymerizable mPEG solution with disk patterns of UV light with an inverted microscope (step I). Then, the substrate was functionalized with PLL-PEG (step II). PEG chains were locally photo-degraded by illuminating the substrate with ring patterns of UV light (step III). Finally, fibronectin was incubated (step IV).



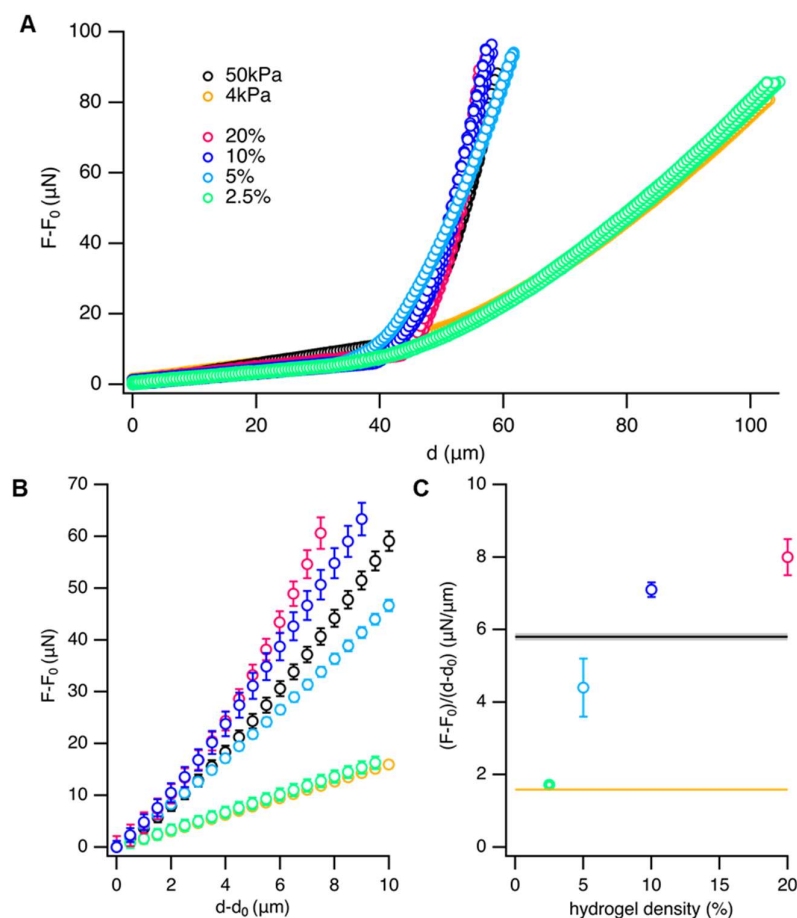

**Figure S9. Elastic modulus of hydrogel films. (A)** Force-displacement curves (N=9) for gels of different densities and calibration gels with  $E=4$  and  $50\text{kPa}$ . **(B)** Averaged curves from A. Data is normalized by the distance at which indentation starts ( $d_0$ , inflection points in A). **(C)** Average slopes from curves in B prior averaging (N=9).

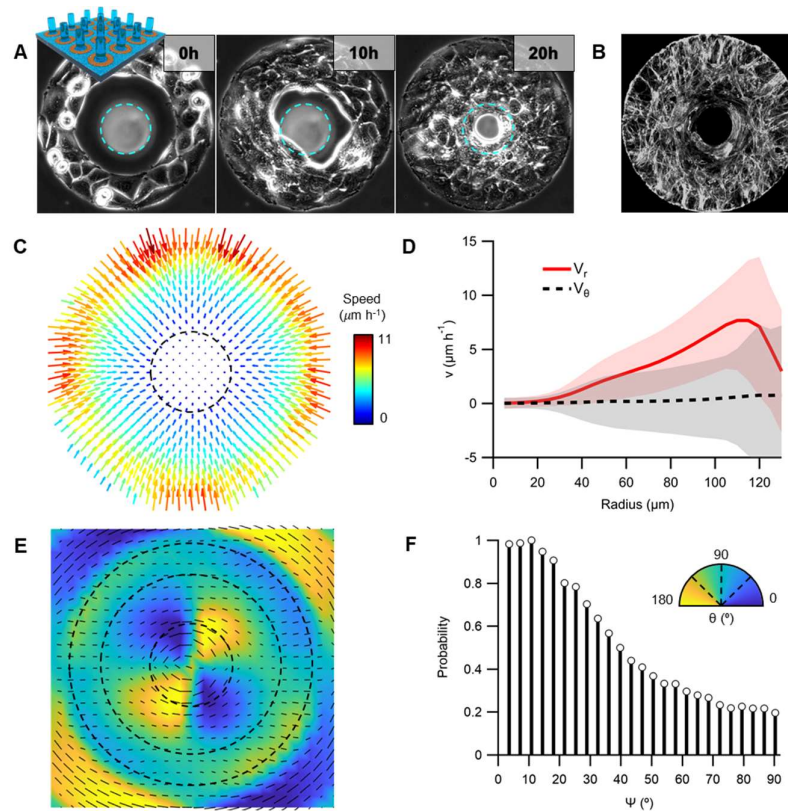

611

612 **Figure S10. Formation of aster arrangements around pillars.** (A) Time-series of  
613 C2C12 cells constricting a hydrogel micro-pillar. Cellular rings,  $r_{\text{ext}}=125\mu\text{m}$ . Cyan  
614 dashed line indicates the initial pillar's section. (B) Actin-stained cells after constriction  
615 show an aster arrangement. (C) Average flow field of flows around pillars (N=9). (D)  
616 Average radial profiles of the radial (red) and azimuthal (black) velocity profiles. (E)  
617 Average orientational field. For clarity, only half of the total number of orientation  
618 vectors are shown. (F)  $\psi$  distribution.  $\psi$  values are calculated from vectors at distances  
619  $r<0.85R$  and  $r>0.65R$ , being  $R$  the radius of the islands, and with  $S>0.3$ .

620

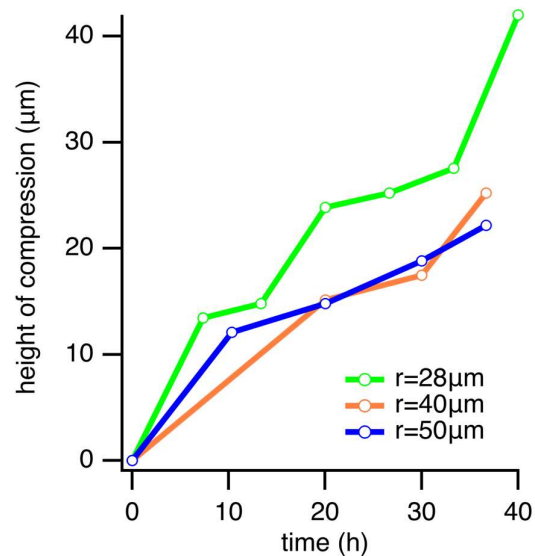

621

622 **Figure S11. Height of pillars' compression.** Temporal evolution of compression'

623 height for pillars with different radii.

624

625

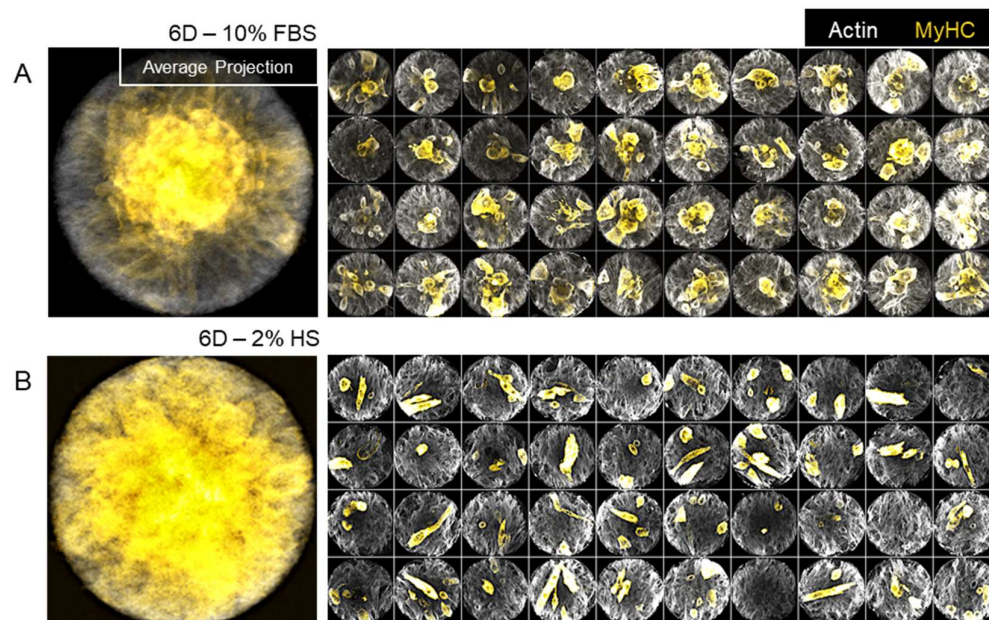

626

627 **Figure S12. Localization of myosin heavy chain expression.** (A) Average projection  
 628 of confocal micrographs of cellular islands (N=40, r=100µm) grown for 6 days in  
 629 complete medium (10% FBS). Individual micrographs are shown in the panels at the  
 630 right. (B) Same analysis corresponding to cellular islands (N=40, r=100 µm) grown for  
 631 6 days under starvation conditions (2% HS).

632

633

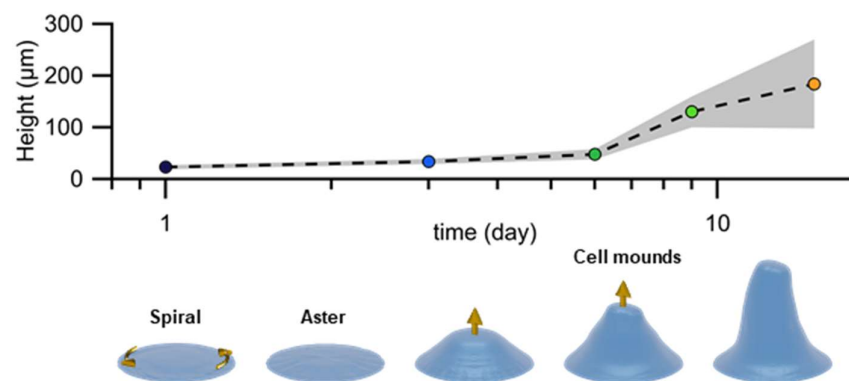

634

635 **Figure S13. Growth of cellular mounds and protrusions.** Average height of C2C12  
636 islands at different timepoints after confluence ( $r=100\mu\text{m}$ ).

637

638 **Supplementary movies**

639 **Movie S1. Unconfined monolayer of C2C12 myoblasts.** Phase contrast time-lapse of  
640 a proliferating monolayer of myoblasts.

641 **Movie S2. Spiral-to-aster transition in a C2C12 myoblast disk.** Phase contrast time-  
642 lapse of myoblast monolayers under circular confinement. In time, cells rearrange from  
643 spiral arrangements into aster arrangements.

644 **Movie S3. Formation of cellular mounds.** Phase contrast time-lapse showing the  
645 formation of cellular mounds in the center of an aster of myoblasts.

646 **Movie S4. Cellular spirals.** Phase contrast time-lapse of low-density circular islands  
647 of myoblasts featuring spiral configurations. Division was blocked with Mitomycin-C.

648 **Movie S5. Actin dynamics in cellular spirals.** Fluorescence confocal time-lapse of  
649 the bottom plane of a cellular spiral. Actin was stained with SiR-Actin.

650 **Movie S6. Cellular asters.** Phase contrast time-lapse of high-density circular islands  
651 of myoblasts. Division was not blocked.

652 **Movie S7. Actin dynamics in cellular asters.** Fluorescence confocal time-lapse of the  
653 bottom plane of a cellular aster. Actin was stained with SiR-Actin.

654 **Movie S8. Pillar constriction experiment.** Differential interference contrast (DIC)  
655 time-lapse showing myoblasts constricting soft hydrogel pillars of different sizes. The  
656 consequent pillars' deformation can be observed in the 3D renderings of the pillars  
657 obtained from fluorescence images' segmentation.

658 **Movie S9. Dynamics and collapse of 3D cellular protrusions.** Phase contrast time-  
659 lapse of a myoblast protrusion, which collapses after confining pattern is degraded.

660



# References

1. T. Lecuit, P.-F. Lenne, E. Munro, Force Generation, Transmission, and Integration during Cell and Tissue Morphogenesis. *Annu. Rev. Cell Dev. Biol.* **27**, 157–184 (2011).
2. J. M. Sawyer, J. R. Harrell, G. Shemer, J. Sullivan-Brown, M. Roh-Johnson, B. Goldstein, Apical constriction: A cell shape change that can drive morphogenesis. *Dev. Biol.* **341**, 5–19 (2010).
3. M. T. Butler, J. B. Wallingford, Planar cell polarity in development and disease. *Nat. Rev. Mol. Cell Biol.* **18**, 375–388 (2017).
4. R. Mayor, S. Etienne-Manneville, The front and rear of collective cell migration. *Nat. Rev. Mol. Cell Biol.* **17**, 97–109 (2016).
5. P. G. de Gennes, J. Prost, *The Physics of Liquid Crystals* (Clarendon Press, 1995), *International Series of Monographs on Physics*.
6. R. Kemkemer, D. Kling, D. Kaufmann, H. Gruler, Elastic properties of nematoid arrangements formed by amoeboid cells. *Eur. Phys. J. E.* **1**, 215 (2000).
7. M. Junkin, S. L. Leung, S. Whitman, C. C. Gregorio, P. K. Wong, Cellular self-organization by autocatalytic alignment feedback. *J. Cell Sci.* **124**, 4213–4220 (2011).
8. G. Duclos, S. Garcia, H. G. Yevick, P. Silberzan, Perfect nematic order in confined monolayers of spindle-shaped cells. *Soft Matter.* **10**, 2346–2353 (2014).
9. H. Morales-Navarrete, H. Nonaka, A. Scholich, F. Segovia-Miranda, W. de Back, K. Meyer, R. L. Bogorad, V. Kotliansky, L. Brusch, Y. Kalaidzidis, F. Jülicher, B. M. Friedrich, M. Zerial, Liquid-crystal organization of liver tissue. *Elife.* **8** (2019), doi:10.7554/eLife.44860.
10. F. C. Keber, E. Loiseau, T. Sanchez, S. J. DeCamp, L. Giomi, M. J. Bowick, M. C. Marchetti, Z. Dogic, A. R. Bausch, Topology and dynamics of active nematic vesicles. *Science (80-. ).* **345**, 1135–1139 (2014).
11. T. Sanchez, D. T. N. Chen, S. J. DeCamp, M. Heymann, Z. Dogic,

- 691 Spontaneous motion in hierarchically assembled active matter. *Nature*. **491**,  
692 431–4 (2012).
- 693 12. N. Kumar, R. Zhang, J. J. de Pablo, M. L. Gardel, Tunable structure and  
694 dynamics of active liquid crystals. *Sci. Adv.* **4**, eaat7779 (2018).
- 695 13. L. Giomi, Geometry and Topology of Turbulence in Active Nematics. *Phys.*  
696 *Rev. X*. **5**, 031003 (2015).
- 697 14. S. P. Thampi, R. Golestanian, J. M. Yeomans, Instabilities and topological  
698 defects in active nematics. *EPL (Europhysics Lett.)* **105**, 18001 (2014).
- 699 15. T. B. Saw, A. Doostmohammadi, V. Nier, L. Kocgozlu, S. Thampi, Y.  
700 Toyama, P. Marcq, C. T. Lim, J. M. Yeomans, B. Ladoux, Topological defects  
701 in epithelia govern cell death and extrusion. *Nature*. **544**, 212–216 (2017).
- 702 16. K. Kawaguchi, R. Kageyama, M. Sano, Topological defects control collective  
703 dynamics in neural progenitor cell cultures. *Nature*. **545**, 327–331 (2017).
- 704 17. D. W. Thompson, J. T. Bonner, *On growth and form* (2014).
- 705 18. Y. Maroudas-Sacks, L. Garion, L. Shani-Zerbib, A. Livshits, E. Braun, K.  
706 Keren, Topological defects in the nematic order of actin fibers as organization  
707 centers of Hydra morphogenesis. *bioRxiv* (2020),  
708 doi:www.doi.org/10.1101/2020.03.02.972539.
- 709 19. H. S. Dua, A. Singh, J. A. P. Gomes, P. R. Laibson, L. A. Donoso, S. Tyagi,  
710 Vortex or whorl formation of cultured human corneal epithelial cells induced  
711 by magnetic fields. *Eye* (1996), doi:10.1038/eye.1996.98.
- 712 20. K. D. Endresen, M. Kim, F. Serra, Topological defects of integer charge in cell  
713 monolayers (2019).
- 714 21. T. Turiv, J. Krieger, G. Babakhanova, H. Yu, S. V. Shiyankovskii, Q.-H. Wei,  
715 M.-H. Kim, O. D. Lavrentovich, Topology control of human cells monolayer  
716 by liquid crystal elastomer (2020).
- 717 22. D. Yaffe, M. Feldman, The formation of hybrid multinucleated muscle fibers  
718 from myoblasts of different genetic origin. *Dev. Biol.* **11**, 300–317 (1965).
- 719 23. M. Zhan, B. Jin, S.-E. Chen, J. M. Reecy, Y.-P. Li, TACE release of TNF-  
720 mediates mechanotransduction-induced activation of p38 MAPK and

- 721 myogenesis. *J. Cell Sci.* **120**, 692–701 (2007).
- 722 24. S. Naskar, V. Kumaran, B. Basu, On The Origin of Shear Stress Induced  
723 Myogenesis Using PMMA Based Lab-on-Chip. *ACS Biomater. Sci. Eng.* **3**,  
724 1154–1171 (2017).
- 725 25. G. Duclos, C. Erlenkamper, J.-F. Joanny, P. Silberzan, Topological defects in  
726 confined populations of spindle-shaped cells. *Nat Phys.* **13**, 58–62 (2017).
- 727 26. H. Wioland, F. G. Woodhouse, J. Dunkel, J. O. Kessler, R. E. Goldstein,  
728 Confinement Stabilizes a Bacterial Suspension into a Spiral Vortex. *Phys. Rev.*  
729 *Lett.* **110**, 268102 (2013).
- 730 27. P. Guillamat, J. Ignés-Mullol, F. Sagués, Taming active turbulence with  
731 patterned soft interfaces. *Nat. Commun.* **8**, 564 (2017).
- 732 28. A. Opatthalage, M. M. Norton, M. P. N. Juniper, B. Langeslay, S. A. Aghvami,  
733 S. Fraden, Z. Dogic, Self-organized dynamics and the transition to turbulence  
734 of confined active nematics. *Proc. Natl. Acad. Sci.* **116**, 4788–4797 (2019).
- 735 29. S. Jalal, S. Shi, V. Acharya, R. Y.-J. Huang, V. Viasnoff, A. D. Bershadsky, Y.  
736 H. Tee, Actin cytoskeleton self-organization in single epithelial cells and  
737 fibroblasts under isotropic confinement. *J. Cell Sci.* **132**, jcs220780 (2019).
- 738 30. K. Kruse, J. F. Joanny, F. Jülicher, J. Prost, K. Sekimoto, Asters, vortices, and  
739 rotating spirals in active gels of polar filaments. *Phys. Rev. Lett.* **92**, 078101  
740 (2004).
- 741 31. V. Schaller, C. Weber, C. Semmrich, E. Frey, A. R. Bausch, Polar patterns of  
742 driven filaments. *Nature.* **467**, 73–77 (2010).
- 743 32. E. Lushi, H. Wioland, R. E. Goldstein, Fluid flows created by swimming  
744 bacteria drive self-organization in confined suspensions. *Proc. Natl. Acad. Sci.*  
745 **111**, 9733–9738 (2014).
- 746 33. K. Doxzen, S. R. K. Vedula, M. C. Leong, H. Hirata, N. S. Gov, A. J. Kabla, B.  
747 Ladoux, C. T. Lim, Guidance of collective cell migration by substrate  
748 geometry. *Integr. Biol.* **5**, 1026 (2013).
- 749 34. S. Fürthauer, M. Neef, S. W. Grill, K. Kruse, F. Jülicher, The Taylor–Couette  
750 motor: spontaneous flows of active polar fluids between two coaxial cylinders.

- 751        *New J. Phys.* **14**, 023001 (2012).
- 752    35.    C. Blanch-Mercader, P. Guillamat, A. Roux, K. Kruse, . *Submitted* (2020).
- 753    36.    C. Blanch-Mercader, P. Guillamat, A. Roux, K. Kruse, . *Submitted* (2020).
- 754    37.    C. M. Hobson, M. Kern, E. T. O’Brien, A. D. Stephens, M. R. Falvo, R.  
755        Superfine, Correlating nuclear morphology and external force with combined  
756        atomic force microscopy and light sheet imaging separates roles of chromatin  
757        and lamin A/C in nuclear mechanics. *bioRxiv* (2020),  
758        doi:10.1101/2020.02.10.942581.
- 759    38.    S. F. Gilbert, M. J. F. Barresi, DEVELOPMENTAL BIOLOGY, 11TH  
760        EDITION 2016. *Am. J. Med. Genet. Part A.* **173**, 1430–1430 (2017).
- 761    39.    L. Pronsato, A. La Colla, A. C. Ronda, L. Milanesi, R. Boland, A.  
762        Vasconsuelo, High passage numbers induce resistance to apoptosis in C2C12  
763        muscle cells. *Biocell* (2013).
- 764    40.    F. Siegert, C. J. Weijer, Spiral and concentric waves organize multicellular  
765        Dictyostelium mounds. *Curr. Biol.* **5**, 937–943 (1995).
- 766    41.    M. Poujade, E. Grasland-Mongrain, A. Hertzog, J. Jouanneau, P. Chavrier, B.  
767        Ladoux, A. Buguin, P. Silberzan, Collective migration of an epithelial  
768        monolayer in response to a model wound. *Proc. Natl. Acad. Sci.* **104**, 15988–  
769        15993 (2007).
- 770    42.    P. O. Strale, A. Azoune, G. Bugnicourt, Y. Lecomte, M. Chahid, V. Studer,  
771        Multiprotein Printing by Light-Induced Molecular Adsorption. *Adv. Mater.* **28**,  
772        2024–2029 (2016).
- 773    43.    Q. Tseng, E. Duchemin-Pelletier, A. Deshiere, M. Balland, H. Guillou, O.  
774        Filhol, M. Théry, Spatial organization of the extracellular matrix regulates cell-  
775        cell junction positioning. *Proc. Natl. Acad. Sci. U. S. A.* **109**, 1506–11 (2012).
- 776    44.    Z. Püspöki, M. Storath, D. Sage, M. Unser, in *Advances in Anatomy*  
777        *Embryology and Cell Biology* (2016), pp. 69–93.
- 778    45.    D. Huterer, T. Vachaspati, Distribution of singularities in the cosmic  
779        microwave background polarization. *Phys. Rev. D.* **72**, 043004 (2005).
- 780    46.    A. M. Kloxin, C. J. Kloxin, C. N. Bowman, K. S. Anseth, Mechanical

781 Properties of Cellularly Responsive Hydrogels and Their Experimental  
782 Determination. *Adv. Mater.* **22**, 3484–3494 (2010).  
783
